# Supplementary material for: RACK1, A multifaceted scaffolding protein: Structure and function
Source: Springer Nature journal article supplement (doi:10.1186/1478-811x-9-22), 2011-10-06

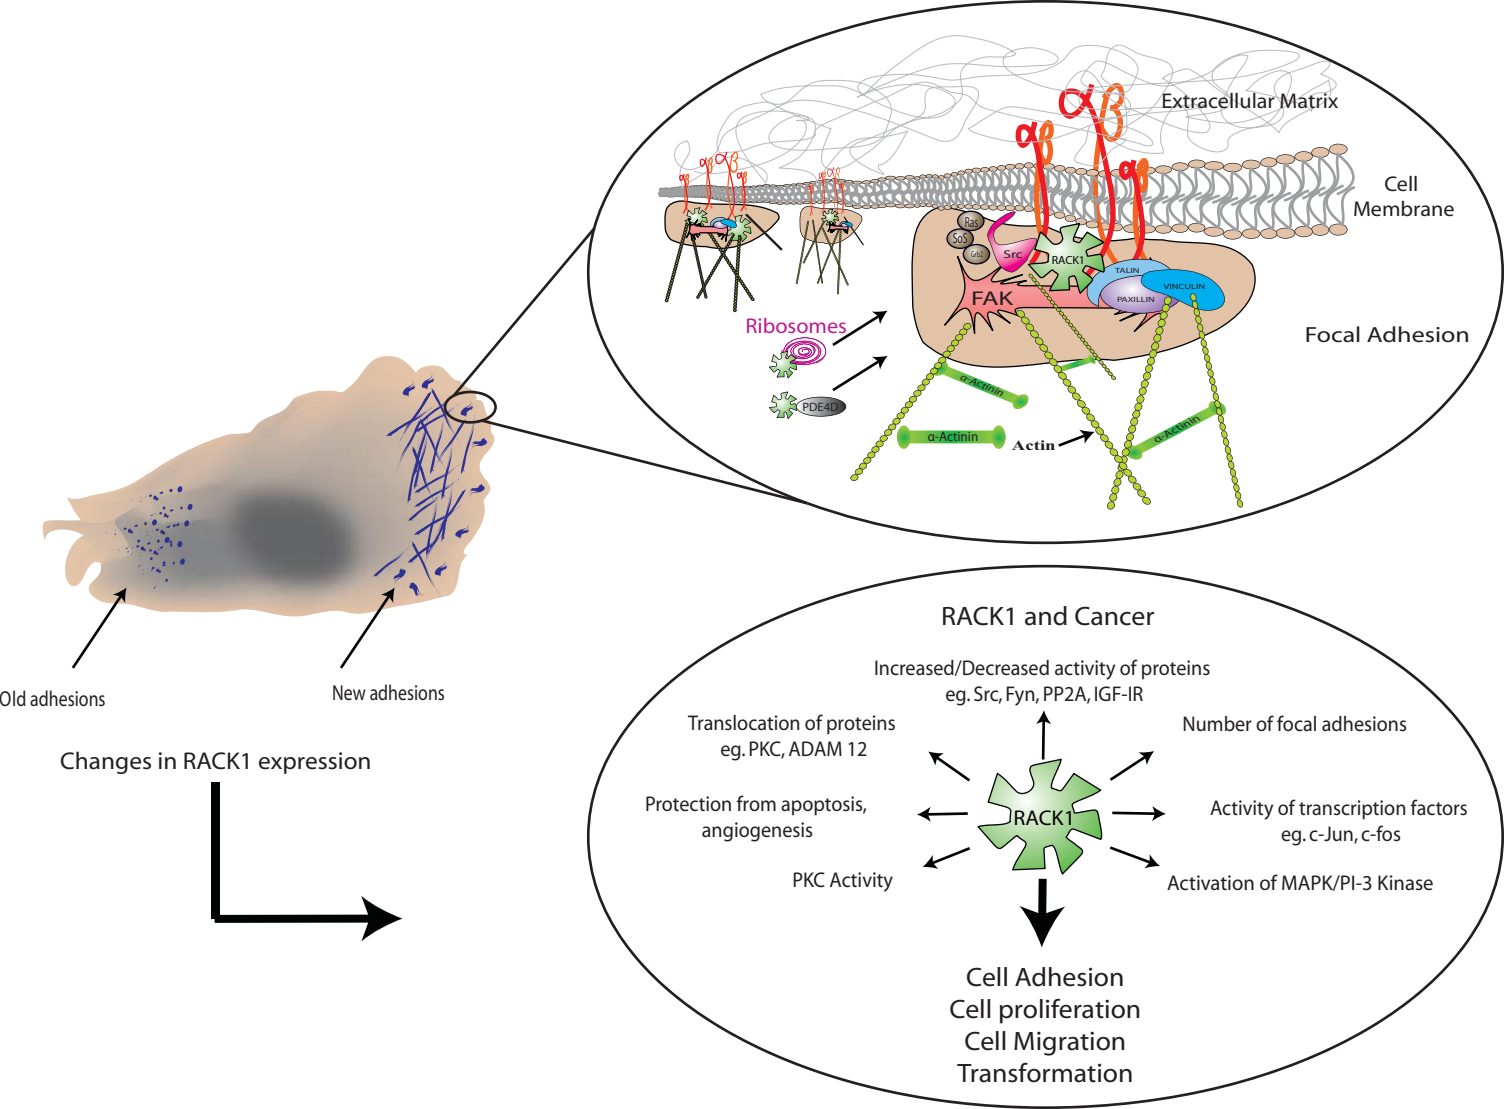

Supplement: 12964_2011_235_MOESM10_ESM.pdf [file 12964_2011_235_MOESM10_ESM.pdf]
